# Supplementary material for: Metrics from Wearable Devices as Candidate Predictors of Antibody Response Following Vaccination against COVID-19: Data from the Second TemPredict Study
Source: MDPI journal article supplement (doi:10.3390/vaccines10020264), 2022-02-09
Supplement: s1 [file s1]

**Table S1.** Spearman rank order correlations between RBD antibody responses and device-generated metrics (retaining  $n=51$  values of “>250 IU/ml” as 250 IU/ml) on nights before and after vaccine injections.

|                             |    | Metric         | Injection 1   |              | Injection 1 |       |               |              | Injection 2   |              |               |              |
|-----------------------------|----|----------------|---------------|--------------|-------------|-------|---------------|--------------|---------------|--------------|---------------|--------------|
|                             |    |                | J&J           |              | Moderna     |       | Pfizer        |              | Moderna       |              | Pfizer        |              |
|                             |    |                | rho           | P            | rho         | P     | rho           | P            | rho           | P            | rho           | P            |
|                             |    |                |               |              |             |       |               |              |               |              |               |              |
| Night Relative to Injection | -2 | Sleep Duration | -0.127        | 0.207        | -0.012      | 0.819 | 0.019         | 0.617        | 0.027         | 0.618        | -0.025        | 0.528        |
|                             |    | REM Sleep      | 0.026         | 0.799        | -0.028      | 0.596 | <b>0.095</b>  | <b>0.015</b> | -0.015        | 0.787        | 0.041         | 0.297        |
|                             |    | Deep Sleep     | -0.139        | 0.166        | 0.004       | 0.938 | 0.040         | 0.298        | 0.100         | 0.066        | 0.063         | 0.109        |
|                             |    | HRV (RMSSD)    | -0.119        | 0.236        | 0.039       | 0.467 | -0.053        | 0.172        | 0.010         | 0.861        | 0.010         | 0.800        |
|                             |    | HR             | -0.038        | 0.706        | 0.028       | 0.595 | <b>0.149</b>  | <b>0.000</b> | 0.022         | 0.684        | <b>0.085</b>  | <b>0.030</b> |
|                             |    | RR             | 0.072         | 0.477        | -0.073      | 0.170 | -0.037        | 0.336        | <b>-0.128</b> | <b>0.018</b> | -0.022        | 0.575        |
|                             |    | Temp Deviation | -0.028        | 0.784        | -0.064      | 0.234 | 0.061         | 0.115        | 0.011         | 0.841        | -0.010        | 0.789        |
|                             | -1 | Sleep Duration | 0.036         | 0.723        | -0.017      | 0.756 | -0.050        | 0.193        | -0.014        | 0.796        | -0.044        | 0.266        |
|                             |    | REM Sleep      | 0.018         | 0.856        | -0.058      | 0.278 | 0.012         | 0.753        | -0.055        | 0.314        | 0.004         | 0.915        |
|                             |    | Deep Sleep     | 0.012         | 0.908        | -0.017      | 0.746 | 0.069         | 0.073        | 0.012         | 0.826        | 0.057         | 0.145        |
|                             |    | HRV (RMSSD)    | -0.081        | 0.421        | 0.074       | 0.163 | -0.004        | 0.922        | 0.060         | 0.270        | 0.028         | 0.480        |
|                             |    | HR             | 0.056         | 0.574        | -0.001      | 0.987 | <b>0.112</b>  | <b>0.004</b> | 0.000         | 0.998        | <b>0.114</b>  | <b>0.003</b> |
|                             |    | RR             | 0.122         | 0.223        | -0.061      | 0.251 | -0.060        | 0.119        | -0.072        | 0.185        | -0.054        | 0.168        |
|                             |    | Temp Deviation | -0.047        | 0.640        | -0.046      | 0.390 | -0.017        | 0.654        | 0.054         | 0.325        | -0.009        | 0.820        |
|                             | 0  | Sleep Duration | 0.125         | 0.211        | 0.096       | 0.076 | <b>-0.082</b> | <b>0.034</b> | 0.001         | 0.991        | -0.027        | 0.482        |
|                             |    | REM Sleep      | 0.054         | 0.593        | 0.045       | 0.400 | 0.002         | 0.952        | 0.054         | 0.321        | 0.027         | 0.487        |
|                             |    | Deep Sleep     | -0.162        | 0.106        | -0.006      | 0.913 | 0.025         | 0.520        | -0.022        | 0.680        | -0.029        | 0.452        |
|                             |    | HRV (RMSSD)    | -0.047        | 0.638        | 0.037       | 0.494 | -0.005        | 0.892        | -0.066        | 0.222        | <b>-0.090</b> | <b>0.020</b> |
|                             |    | HR             | 0.125         | 0.213        | 0.012       | 0.829 | <b>0.104</b>  | <b>0.007</b> | <b>0.148</b>  | <b>0.006</b> | <b>0.185</b>  | <b>0.000</b> |
|                             |    | RR             | 0.123         | 0.222        | -0.059      | 0.275 | -0.034        | 0.380        | 0.000         | 0.996        | 0.025         | 0.531        |
|                             |    | Temp Deviation | 0.155         | 0.122        | 0.006       | 0.917 | -0.021        | 0.587        | <b>0.132</b>  | <b>0.014</b> | <b>0.133</b>  | <b>0.001</b> |
|                             | 1  | Sleep Duration | <b>-0.202</b> | <b>0.044</b> | -0.044      | 0.408 | 0.001         | 0.980        | 0.042         | 0.448        | 0.004         | 0.919        |
|                             |    | REM Sleep      | -0.056        | 0.580        | 0.028       | 0.600 | 0.045         | 0.252        | 0.045         | 0.417        | <b>0.082</b>  | <b>0.038</b> |
|                             |    | Deep Sleep     | -0.149        | 0.138        | -0.006      | 0.913 | 0.061         | 0.114        | -0.051        | 0.350        | 0.043         | 0.272        |
|                             |    | HRV (RMSSD)    | -0.073        | 0.471        | 0.025       | 0.639 | -0.024        | 0.530        | 0.039         | 0.481        | -0.026        | 0.514        |
|                             |    | HR             | 0.049         | 0.631        | 0.005       | 0.931 | <b>0.103</b>  | <b>0.008</b> | 0.030         | 0.587        | <b>0.132</b>  | <b>0.001</b> |
|                             |    | RR             | 0.157         | 0.119        | -0.036      | 0.505 | -0.043        | 0.268        | -0.035        | 0.525        | 0.073         | 0.065        |
|                             |    | Temp Deviation | 0.093         | 0.356        | 0.045       | 0.400 | -0.040        | 0.302        | 0.096         | 0.081        | <b>0.172</b>  | <b>0.000</b> |
|                             | 2  | Sleep Duration | 0.046         | 0.646        | 0.008       | 0.884 | -0.004        | 0.925        | -0.003        | 0.959        | <b>-0.091</b> | <b>0.020</b> |
|                             |    | REM Sleep      | 0.019         | 0.853        | 0.002       | 0.970 | 0.036         | 0.350        | 0.008         | 0.879        | -0.004        | 0.921        |
|                             |    | Deep Sleep     | 0.026         | 0.795        | -0.018      | 0.732 | 0.006         | 0.878        | 0.044         | 0.424        | -0.002        | 0.955        |
|                             |    | HRV (RMSSD)    | -0.074        | 0.465        | 0.026       | 0.631 | -0.021        | 0.592        | 0.034         | 0.539        | -0.044        | 0.263        |
|                             |    | HR             | 0.108         | 0.282        | 0.038       | 0.483 | <b>0.109</b>  | <b>0.005</b> | 0.024         | 0.659        | <b>0.110</b>  | <b>0.005</b> |
|                             |    | RR             | 0.144         | 0.152        | -0.036      | 0.497 | -0.055        | 0.156        | -0.065        | 0.233        | -0.006        | 0.880        |
|                             |    | Temp Deviation | 0.187         | 0.062        | 0.006       | 0.912 | 0.000         | 0.997        | 0.099         | 0.072        | 0.003         | 0.940        |

Note. See Table 2 note. Analyses are identical to Table 2, however, retain the  $n=51$  participants whose RBD antibody responses were returned from LabCorp as “>250 IU/ml” as having values of 250 IU/ml.

# Supplementary Tables

**Table S2.** Spearman rank order correlations between RBD antibody responses and device-generated metrics before and after adjusting for the pre-vaccination baseline period (retaining  $n=51$  values of “>250 IU/ml” as 250 IU/ml) on nights surrounding injections for Moderna-NIAID and Pfizer-BioNTech vaccine recipients, combined.

|                             |    | Metric         | Device-generated Metric |              |               |              | Adjusted for Baseline period |              |               |              |
|-----------------------------|----|----------------|-------------------------|--------------|---------------|--------------|------------------------------|--------------|---------------|--------------|
|                             |    |                | Injection 1             |              | Injection 2   |              | Injection 1                  |              | Injection 2   |              |
|                             |    |                | $\rho$                  | $P$          | $\rho$        | $P$          | $\rho$                       | $P$          | $\rho$        | $P$          |
|                             |    |                |                         |              |               |              |                              |              |               |              |
| Night Relative to Injection | -2 | Sleep Duration | 0.005                   | 0.868        | 0.008         | 0.802        | 0.008                        | 0.800        | 0.038         | 0.230        |
|                             |    | REM Sleep      | 0.052                   | 0.100        | 0.036         | 0.252        | 0.018                        | 0.559        | 0.014         | 0.656        |
|                             |    | Deep Sleep     | 0.022                   | 0.487        | 0.062         | 0.051        | 0.010                        | 0.756        | 0.045         | 0.157        |
|                             |    | HRV (RMSSD)    | -0.028                  | 0.370        | -0.015        | 0.638        | -0.058                       | 0.064        | -0.003        | 0.915        |
|                             |    | HR             | <b>0.107</b>            | <b>0.001</b> | <b>0.063</b>  | <b>0.046</b> | <b>0.079</b>                 | <b>0.012</b> | -0.029        | 0.367        |
|                             |    | RR             | -0.030                  | 0.335        | -0.055        | 0.080        | 0.058                        | 0.064        | -0.018        | 0.566        |
|                             |    | Temp Deviation | 0.010                   | 0.753        | -0.010        | 0.758        | 0.034                        | 0.278        | 0.013         | 0.676        |
|                             | -1 | Sleep Duration | -0.017                  | 0.587        | -0.014        | 0.659        | -0.029                       | 0.358        | -0.001        | 0.976        |
|                             |    | REM Sleep      | 0.019                   | 0.551        | -0.007        | 0.835        | -0.013                       | 0.670        | -0.041        | 0.202        |
|                             |    | Deep Sleep     | 0.041                   | 0.188        | 0.040         | 0.208        | 0.052                        | 0.095        | 0.022         | 0.481        |
|                             |    | HRV (RMSSD)    | 0.005                   | 0.878        | 0.040         | 0.212        | 0.024                        | 0.438        | <b>0.073</b>  | <b>0.022</b> |
|                             |    | HR             | <b>0.070</b>            | <b>0.025</b> | <b>0.063</b>  | <b>0.048</b> | -0.035                       | 0.268        | -0.018        | 0.573        |
|                             |    | RR             | -0.040                  | 0.205        | -0.053        | 0.093        | -0.003                       | 0.935        | -0.033        | 0.299        |
|                             |    | Temp Deviation | -0.014                  | 0.658        | -0.003        | 0.916        | 0.015                        | 0.627        | 0.027         | 0.390        |
|                             | 0  | Sleep Duration | -0.017                  | 0.590        | -0.008        | 0.792        | -0.022                       | 0.479        | 0.014         | 0.648        |
|                             |    | REM Sleep      | 0.013                   | 0.668        | 0.035         | 0.271        | -0.023                       | 0.463        | 0.017         | 0.591        |
|                             |    | Deep Sleep     | -0.007                  | 0.814        | -0.056        | 0.074        | -0.022                       | 0.491        | <b>-0.114</b> | <b>0.000</b> |
|                             |    | HRV (RMSSD)    | -0.010                  | 0.754        | <b>-0.117</b> | <b>0.000</b> | 0.006                        | 0.849        | <b>-0.188</b> | <b>0.000</b> |
|                             |    | HR             | <b>0.072</b>            | <b>0.022</b> | <b>0.203</b>  | <b>0.000</b> | -0.009                       | 0.785        | <b>0.195</b>  | <b>0.000</b> |
|                             |    | RR             | -0.026                  | 0.403        | 0.058         | 0.065        | 0.061                        | 0.052        | <b>0.183</b>  | <b>0.000</b> |
|                             |    | Temp Deviation | -0.004                  | 0.899        | <b>0.221</b>  | <b>0.000</b> | 0.014                        | 0.650        | <b>0.228</b>  | <b>0.000</b> |
|                             | 1  | Sleep Duration | -0.014                  | 0.647        | 0.061         | 0.057        | -0.008                       | 0.796        | <b>0.109</b>  | <b>0.001</b> |
|                             |    | REM Sleep      | 0.036                   | 0.253        | <b>0.073</b>  | <b>0.022</b> | 0.005                        | 0.863        | <b>0.067</b>  | <b>0.035</b> |
|                             |    | Deep Sleep     | 0.029                   | 0.359        | 0.010         | 0.752        | 0.020                        | 0.525        | -0.020        | 0.541        |
|                             |    | HRV (RMSSD)    | -0.032                  | 0.301        | -0.025        | 0.428        | <b>-0.076</b>                | <b>0.015</b> | -0.059        | 0.064        |
|                             |    | HR             | <b>0.082</b>            | <b>0.009</b> | <b>0.105</b>  | <b>0.001</b> | 0.031                        | 0.325        | <b>0.067</b>  | <b>0.037</b> |
|                             |    | RR             | -0.005                  | 0.876        | <b>0.071</b>  | <b>0.026</b> | <b>0.095</b>                 | <b>0.002</b> | <b>0.228</b>  | <b>0.000</b> |
|                             |    | Temp Deviation | 0.026                   | 0.407        | <b>0.211</b>  | <b>0.000</b> | 0.049                        | 0.121        | <b>0.219</b>  | <b>0.000</b> |
|                             | 2  | Sleep Duration | 0.025                   | 0.425        | -0.059        | 0.065        | 0.039                        | 0.208        | -0.062        | 0.051        |
|                             |    | REM Sleep      | 0.045                   | 0.151        | -0.002        | 0.948        | 0.033                        | 0.299        | -0.034        | 0.286        |
|                             |    | Deep Sleep     | -0.009                  | 0.773        | -0.002        | 0.956        | -0.009                       | 0.765        | -0.023        | 0.467        |
|                             |    | HRV (RMSSD)    | -0.021                  | 0.510        | -0.025        | 0.427        | -0.009                       | 0.775        | -0.026        | 0.409        |
|                             |    | HR             | <b>0.083</b>            | <b>0.008</b> | <b>0.072</b>  | <b>0.024</b> | 0.012                        | 0.704        | -0.017        | 0.591        |
|                             |    | RR             | -0.038                  | 0.228        | -0.001        | 0.980        | 0.039                        | 0.215        | <b>0.095</b>  | <b>0.003</b> |
|                             |    | Temp Deviation | 0.025                   | 0.430        | 0.058         | 0.070        | 0.031                        | 0.321        | 0.061         | 0.056        |

Note. See Table 2 and Table 3 notes for variable descriptions and preparations. Analyses are identical to Table 3, however, retain the  $n=51$  participants whose RBD antibody responses were returned from LabCorp as “>250 IU/ml” as having values of 250 IU/ml.

# Supplementary Tables

**Table S3.** Spearman rank order correlations between RBD antibody responses and device-generated metrics (retaining  $n=51$  values of “>250 IU/ml” as 250 IU/ml) on nights before and after vaccine injections, adjusted for the pre-vaccination baseline period.

|                             |    | Metric         | Injection 1   |              | Injection 1  |              |               |              | Injection 2   |              |               |              |
|-----------------------------|----|----------------|---------------|--------------|--------------|--------------|---------------|--------------|---------------|--------------|---------------|--------------|
|                             |    |                | J&J           |              | Moderna      |              | Pfizer        |              | Moderna       |              | Pfizer        |              |
|                             |    |                | rho           | P            | rho          | P            | rho           | P            | rho           | P            | rho           | P            |
|                             |    |                |               |              |              |              |               |              |               |              |               |              |
| Night Relative to Injection | -2 | Sleep Duration | -0.095        | 0.343        | -0.012       | 0.825        | 0.053         | 0.172        | 0.062         | 0.257        | 0.035         | 0.366        |
|                             |    | REM Sleep      | -0.052        | 0.605        | -0.063       | 0.240        | 0.071         | 0.069        | -0.024        | 0.661        | 0.028         | 0.472        |
|                             |    | Deep Sleep     | -0.137        | 0.173        | -0.004       | 0.944        | 0.010         | 0.787        | 0.093         | 0.088        | 0.027         | 0.491        |
|                             |    | HRV (RMSSD)    | -0.105        | 0.297        | -0.006       | 0.910        | <b>-0.102</b> | <b>0.009</b> | 0.006         | 0.907        | 0.024         | 0.542        |
|                             |    | HR             | -0.111        | 0.268        | 0.013        | 0.807        | <b>0.105</b>  | <b>0.007</b> | -0.036        | 0.505        | -0.060        | 0.123        |
|                             |    | RR             | -0.076        | 0.450        | -0.045       | 0.398        | <b>0.083</b>  | <b>0.032</b> | -0.046        | 0.403        | 0.024         | 0.539        |
|                             |    | Temp Deviation | -0.052        | 0.605        | -0.017       | 0.752        | 0.067         | 0.084        | 0.037         | 0.494        | -0.005        | 0.903        |
|                             | -1 | Sleep Duration | 0.033         | 0.740        | -0.033       | 0.531        | -0.048        | 0.217        | 0.012         | 0.823        | -0.001        | 0.984        |
|                             |    | REM Sleep      | -0.016        | 0.874        | -0.066       | 0.209        | -0.037        | 0.335        | -0.079        | 0.148        | -0.035        | 0.368        |
|                             |    | Deep Sleep     | 0.062         | 0.539        | -0.026       | 0.618        | 0.066         | 0.087        | -0.008        | 0.887        | 0.024         | 0.533        |
|                             |    | HRV (RMSSD)    | -0.077        | 0.441        | 0.054        | 0.311        | 0.015         | 0.702        | 0.069         | 0.207        | 0.046         | 0.238        |
|                             |    | HR             | 0.128         | 0.199        | -0.033       | 0.531        | -0.032        | 0.414        | -0.093        | 0.087        | 0.027         | 0.490        |
|                             |    | RR             | 0.007         | 0.947        | -0.039       | 0.464        | 0.006         | 0.886        | -0.025        | 0.644        | 0.017         | 0.665        |
|                             |    | Temp Deviation | 0.004         | 0.971        | 0.004        | 0.945        | -0.012        | 0.758        | 0.076         | 0.163        | -0.004        | 0.910        |
|                             | 0  | Sleep Duration | 0.166         | 0.098        | 0.094        | 0.083        | -0.057        | 0.138        | 0.011         | 0.841        | 0.011         | 0.784        |
|                             |    | REM Sleep      | 0.106         | 0.293        | 0.025        | 0.641        | -0.035        | 0.367        | 0.038         | 0.488        | 0.005         | 0.899        |
|                             |    | Deep Sleep     | -0.173        | 0.083        | -0.036       | 0.510        | -0.011        | 0.779        | -0.072        | 0.181        | <b>-0.100</b> | <b>0.011</b> |
|                             |    | HRV (RMSSD)    | -0.001        | 0.993        | -0.014       | 0.791        | 0.020         | 0.605        | <b>-0.158</b> | <b>0.003</b> | <b>-0.155</b> | <b>0.000</b> |
|                             |    | HR             | 0.125         | 0.212        | -0.027       | 0.620        | -0.042        | 0.276        | <b>0.158</b>  | <b>0.003</b> | <b>0.111</b>  | <b>0.004</b> |
|                             |    | RR             | 0.113         | 0.262        | 0.035        | 0.516        | 0.054         | 0.160        | <b>0.181</b>  | <b>0.001</b> | <b>0.112</b>  | <b>0.004</b> |
|                             |    | Temp Deviation | 0.141         | 0.160        | 0.026        | 0.624        | -0.013        | 0.744        | <b>0.157</b>  | <b>0.003</b> | <b>0.139</b>  | <b>0.000</b> |
|                             | 1  | Sleep Duration | <b>-0.224</b> | <b>0.025</b> | -0.062       | 0.248        | 0.034         | 0.382        | 0.045         | 0.410        | <b>0.082</b>  | <b>0.038</b> |
|                             |    | REM Sleep      | <b>-0.281</b> | <b>0.005</b> | 0.043        | 0.423        | -0.010        | 0.798        | 0.066         | 0.228        | 0.059         | 0.138        |
|                             |    | Deep Sleep     | -0.152        | 0.130        | -0.026       | 0.630        | 0.054         | 0.164        | -0.102        | 0.063        | 0.003         | 0.936        |
|                             |    | HRV (RMSSD)    | 0.002         | 0.986        | -0.046       | 0.392        | -0.057        | 0.146        | -0.009        | 0.863        | -0.040        | 0.309        |
|                             |    | HR             | 0.042         | 0.677        | -0.031       | 0.565        | -0.009        | 0.810        | 0.018         | 0.737        | 0.046         | 0.243        |
|                             |    | RR             | 0.057         | 0.573        | <b>0.108</b> | <b>0.043</b> | 0.041         | 0.290        | <b>0.126</b>  | <b>0.022</b> | <b>0.233</b>  | <b>0.000</b> |
|                             |    | Temp Deviation | 0.067         | 0.511        | 0.085        | 0.113        | -0.024        | 0.535        | <b>0.127</b>  | <b>0.021</b> | <b>0.169</b>  | <b>0.000</b> |
|                             | 2  | Sleep Duration | 0.030         | 0.769        | -0.004       | 0.938        | 0.047         | 0.223        | -0.037        | 0.505        | -0.048        | 0.219        |
|                             |    | REM Sleep      | -0.125        | 0.214        | -0.019       | 0.728        | 0.022         | 0.575        | -0.049        | 0.377        | -0.022        | 0.569        |
|                             |    | Deep Sleep     | 0.052         | 0.602        | -0.004       | 0.940        | -0.008        | 0.841        | 0.043         | 0.437        | -0.054        | 0.173        |
|                             |    | HRV (RMSSD)    | -0.039        | 0.701        | 0.039        | 0.467        | -0.026        | 0.498        | 0.018         | 0.738        | <b>-0.079</b> | <b>0.043</b> |
|                             |    | HR             | 0.111         | 0.269        | -0.014       | 0.797        | 0.014         | 0.715        | -0.034        | 0.542        | 0.013         | 0.749        |
|                             |    | RR             | 0.082         | 0.416        | 0.049        | 0.358        | 0.026         | 0.510        | 0.082         | 0.132        | <b>0.088</b>  | <b>0.024</b> |
|                             |    | Temp Deviation | 0.195         | 0.051        | 0.043        | 0.420        | -0.006        | 0.878        | <b>0.117</b>  | <b>0.032</b> | -0.006        | 0.874        |

Note. See Table 2 and Table 3 notes for variable descriptions and preparations. Analyses are identical to Table 4, however, retain the  $n=51$  participants whose RBD antibody responses were returned from LabCorp as “>250 IU/ml” (rather than a specific value).

**Table S4.** Kendall rank order correlations between RBD antibody responses and device-generated metrics on nights before and after vaccine injections.

|                             |    | Metric         | Injection 1   |              | Injection 1 |       |               |              | Injection 2   |              |               |              |
|-----------------------------|----|----------------|---------------|--------------|-------------|-------|---------------|--------------|---------------|--------------|---------------|--------------|
|                             |    |                | J&J           |              | Moderna     |       | Pfizer        |              | Moderna       |              | Pfizer        |              |
|                             |    |                | $\tau$        | $P$          | $\tau$      | $P$   | $\tau$        | $P$          | $\tau$        | $P$          | $\tau$        | $P$          |
|                             |    |                |               |              |             |       |               |              |               |              |               |              |
| Night Relative to Injection | -2 | Sleep Duration | -0.086        | 0.204        | -0.024      | 0.574 | 0.011         | 0.692        | 0.053         | 0.219        | -0.016        | 0.563        |
|                             |    | REM Sleep      | 0.019         | 0.774        | -0.029      | 0.494 | <b>0.073</b>  | <b>0.008</b> | 0.007         | 0.866        | 0.043         | 0.124        |
|                             |    | Deep Sleep     | -0.095        | 0.162        | -0.019      | 0.647 | 0.006         | 0.829        | 0.054         | 0.213        | 0.034         | 0.222        |
|                             |    | HRV (RMSSD)    | -0.076        | 0.262        | 0.012       | 0.782 | -0.033        | 0.237        | 0.006         | 0.885        | 0.017         | 0.543        |
|                             |    | HR             | -0.022        | 0.747        | 0.025       | 0.553 | <b>0.096</b>  | <b>0.000</b> | 0.025         | 0.561        | 0.043         | 0.120        |
|                             |    | RR             | 0.053         | 0.436        | -0.038      | 0.372 | -0.048        | 0.082        | <b>-0.102</b> | <b>0.019</b> | -0.033        | 0.243        |
|                             |    | Temp Deviation | -0.009        | 0.890        | -0.009      | 0.833 | 0.037         | 0.186        | 0.033         | 0.446        | -0.004        | 0.884        |
|                             | -1 | Sleep Duration | 0.025         | 0.716        | -0.017      | 0.685 | -0.031        | 0.261        | -0.043        | 0.314        | -0.048        | 0.086        |
|                             |    | REM Sleep      | 0.018         | 0.792        | -0.048      | 0.253 | 0.022         | 0.418        | -0.064        | 0.134        | 0.001         | 0.971        |
|                             |    | Deep Sleep     | 0.005         | 0.942        | -0.036      | 0.392 | 0.032         | 0.242        | 0.005         | 0.904        | 0.033         | 0.241        |
|                             |    | HRV (RMSSD)    | -0.054        | 0.425        | 0.038       | 0.363 | 0.000         | 0.996        | 0.021         | 0.627        | 0.031         | 0.267        |
|                             |    | HR             | 0.036         | 0.589        | 0.015       | 0.716 | <b>0.072</b>  | <b>0.009</b> | 0.014         | 0.748        | <b>0.064</b>  | <b>0.021</b> |
|                             |    | RR             | 0.085         | 0.211        | -0.036      | 0.394 | <b>-0.067</b> | <b>0.016</b> | -0.037        | 0.392        | <b>-0.056</b> | <b>0.044</b> |
|                             |    | Temp Deviation | -0.028        | 0.683        | -0.017      | 0.688 | 0.002         | 0.955        | 0.041         | 0.344        | -0.016        | 0.566        |
|                             | 0  | Sleep Duration | 0.084         | 0.213        | 0.049       | 0.246 | <b>-0.056</b> | <b>0.041</b> | -0.003        | 0.940        | -0.024        | 0.396        |
|                             |    | REM Sleep      | 0.033         | 0.628        | 0.036       | 0.399 | -0.001        | 0.961        | 0.019         | 0.652        | 0.024         | 0.395        |
|                             |    | Deep Sleep     | -0.111        | 0.100        | -0.007      | 0.861 | 0.003         | 0.908        | -0.019        | 0.654        | -0.040        | 0.147        |
|                             |    | HRV (RMSSD)    | -0.029        | 0.668        | 0.008       | 0.850 | 0.005         | 0.870        | -0.044        | 0.308        | <b>-0.064</b> | <b>0.023</b> |
|                             |    | HR             | 0.085         | 0.209        | 0.006       | 0.889 | <b>0.070</b>  | <b>0.011</b> | <b>0.105</b>  | <b>0.014</b> | <b>0.123</b>  | <b>0.000</b> |
|                             |    | RR             | 0.085         | 0.214        | -0.039      | 0.362 | -0.041        | 0.141        | -0.016        | 0.707        | -0.004        | 0.892        |
|                             |    | Temp Deviation | 0.112         | 0.097        | -0.008      | 0.857 | -0.002        | 0.956        | <b>0.096</b>  | <b>0.024</b> | <b>0.107</b>  | <b>0.000</b> |
|                             | 1  | Sleep Duration | <b>-0.135</b> | <b>0.047</b> | -0.041      | 0.330 | -0.001        | 0.961        | 0.053         | 0.223        | -0.005        | 0.864        |
|                             |    | REM Sleep      | -0.035        | 0.606        | 0.016       | 0.699 | 0.030         | 0.278        | 0.054         | 0.215        | <b>0.057</b>  | <b>0.040</b> |
|                             |    | Deep Sleep     | -0.089        | 0.189        | -0.004      | 0.919 | 0.029         | 0.298        | -0.068        | 0.120        | 0.018         | 0.516        |
|                             |    | HRV (RMSSD)    | -0.045        | 0.508        | 0.001       | 0.981 | -0.009        | 0.754        | 0.009         | 0.835        | -0.011        | 0.690        |
|                             |    | HR             | 0.036         | 0.598        | 0.001       | 0.976 | <b>0.061</b>  | <b>0.028</b> | 0.040         | 0.359        | <b>0.080</b>  | <b>0.004</b> |
|                             |    | RR             | 0.111         | 0.107        | -0.024      | 0.576 | -0.046        | 0.097        | -0.005        | 0.909        | 0.034         | 0.228        |
|                             |    | Temp Deviation | 0.066         | 0.334        | 0.042       | 0.316 | -0.021        | 0.446        | <b>0.104</b>  | <b>0.017</b> | <b>0.129</b>  | <b>0.000</b> |
|                             | 2  | Sleep Duration | 0.032         | 0.639        | -0.016      | 0.695 | -0.012        | 0.660        | -0.047        | 0.280        | <b>-0.075</b> | <b>0.007</b> |
|                             |    | REM Sleep      | 0.010         | 0.883        | -0.020      | 0.635 | 0.021         | 0.438        | -0.029        | 0.508        | -0.001        | 0.977        |
|                             |    | Deep Sleep     | 0.022         | 0.740        | -0.029      | 0.487 | -0.005        | 0.867        | 0.008         | 0.845        | -0.010        | 0.715        |
|                             |    | HRV (RMSSD)    | -0.042        | 0.538        | 0.029       | 0.498 | 0.004         | 0.896        | 0.005         | 0.913        | -0.029        | 0.307        |
|                             |    | HR             | 0.078         | 0.248        | 0.025       | 0.549 | <b>0.062</b>  | <b>0.025</b> | 0.031         | 0.481        | <b>0.069</b>  | <b>0.014</b> |
|                             |    | RR             | 0.098         | 0.153        | -0.001      | 0.981 | <b>-0.065</b> | <b>0.020</b> | -0.038        | 0.385        | -0.021        | 0.453        |
|                             |    | Temp Deviation | 0.130         | 0.055        | 0.000       | 0.998 | -0.013        | 0.628        | 0.062         | 0.152        | 0.014         | 0.617        |

Note. See Table 2 note. Kendall rank order correlations directly account for tied ranks and better manage Type 1 error rates (see Materials and Methods).

# Supplementary Tables

**Table S5.** Kendall rank order correlations between RBD antibody responses and device-generated metrics before and after adjusting by the pre-vaccination baseline period on nights before and after injections for Moderna-NIAID and Pfizer-BioNTech vaccine recipients, combined.

|                             |    | Metric         | Device-generated Metric |              |               |              | Adjusted for Baseline period |              |               |              |
|-----------------------------|----|----------------|-------------------------|--------------|---------------|--------------|------------------------------|--------------|---------------|--------------|
|                             |    |                | Injection 1             |              | Injection 2   |              | Injection 1                  |              | Injection 2   |              |
|                             |    |                | $\tau$                  | $P$          | $\tau$        | $P$          | $\tau$                       | $P$          | $\tau$        | $P$          |
|                             |    |                |                         |              |               |              |                              |              |               |              |
| Night Relative to Injection | -2 | Sleep Duration | -0.001                  | 0.949        | 0.015         | 0.526        | 0.000                        | 0.995        | 0.044         | 0.059        |
|                             |    | REM Sleep      | 0.041                   | 0.074        | 0.042         | 0.070        | 0.020                        | 0.388        | 0.027         | 0.246        |
|                             |    | Deep Sleep     | -0.006                  | 0.788        | 0.030         | 0.196        | -0.003                       | 0.882        | 0.029         | 0.211        |
|                             |    | HRV (RMSSD)    | -0.022                  | 0.334        | -0.005        | 0.818        | <b>-0.047</b>                | <b>0.041</b> | 0.002         | 0.916        |
|                             |    | HR             | <b>0.072</b>            | <b>0.002</b> | 0.036         | 0.119        | <b>0.058</b>                 | <b>0.012</b> | -0.016        | 0.489        |
|                             |    | RR             | -0.031                  | 0.183        | <b>-0.052</b> | <b>0.027</b> | 0.041                        | 0.071        | -0.008        | 0.728        |
|                             |    | Temp Deviation | 0.012                   | 0.603        | 0.001         | 0.973        | 0.031                        | 0.172        | 0.016         | 0.495        |
|                             | -1 | Sleep Duration | -0.008                  | 0.724        | -0.030        | 0.201        | -0.007                       | 0.750        | -0.016        | 0.482        |
|                             |    | REM Sleep      | 0.026                   | 0.266        | -0.011        | 0.644        | 0.005                        | 0.815        | -0.036        | 0.121        |
|                             |    | Deep Sleep     | 0.012                   | 0.596        | 0.022         | 0.343        | 0.040                        | 0.080        | 0.017         | 0.472        |
|                             |    | HRV (RMSSD)    | -0.001                  | 0.972        | 0.031         | 0.188        | 0.008                        | 0.719        | <b>0.052</b>  | <b>0.025</b> |
|                             |    | HR             | <b>0.050</b>            | <b>0.030</b> | 0.037         | 0.114        | -0.006                       | 0.783        | -0.008        | 0.740        |
|                             |    | RR             | -0.041                  | 0.074        | <b>-0.047</b> | <b>0.046</b> | 0.006                        | 0.781        | -0.018        | 0.439        |
|                             |    | Temp Deviation | 0.005                   | 0.815        | -0.011        | 0.652        | 0.026                        | 0.262        | 0.013         | 0.591        |
|                             | 0  | Sleep Duration | -0.017                  | 0.471        | -0.009        | 0.692        | -0.013                       | 0.573        | 0.017         | 0.461        |
|                             |    | REM Sleep      | 0.007                   | 0.762        | 0.023         | 0.332        | -0.017                       | 0.466        | 0.016         | 0.497        |
|                             |    | Deep Sleep     | -0.019                  | 0.420        | <b>-0.057</b> | <b>0.014</b> | -0.010                       | 0.656        | <b>-0.091</b> | <b>0.000</b> |
|                             |    | HRV (RMSSD)    | -0.007                  | 0.751        | <b>-0.085</b> | <b>0.000</b> | -0.005                       | 0.826        | <b>-0.143</b> | <b>0.000</b> |
|                             |    | HR             | <b>0.050</b>            | <b>0.030</b> | <b>0.141</b>  | <b>0.000</b> | 0.008                        | 0.717        | <b>0.149</b>  | <b>0.000</b> |
|                             |    | RR             | -0.029                  | 0.219        | 0.027         | 0.251        | <b>0.050</b>                 | <b>0.028</b> | <b>0.127</b>  | <b>0.000</b> |
|                             |    | Temp Deviation | 0.005                   | 0.843        | <b>0.172</b>  | <b>0.000</b> | 0.017                        | 0.472        | <b>0.176</b>  | <b>0.000</b> |
|                             | 1  | Sleep Duration | -0.013                  | 0.562        | <b>0.047</b>  | <b>0.043</b> | -0.011                       | 0.638        | <b>0.090</b>  | <b>0.000</b> |
|                             |    | REM Sleep      | 0.023                   | 0.312        | <b>0.058</b>  | <b>0.013</b> | 0.007                        | 0.749        | <b>0.060</b>  | <b>0.010</b> |
|                             |    | Deep Sleep     | 0.010                   | 0.659        | -0.009        | 0.711        | 0.020                        | 0.377        | -0.014        | 0.548        |
|                             |    | HRV (RMSSD)    | -0.023                  | 0.312        | -0.020        | 0.388        | <b>-0.057</b>                | <b>0.013</b> | <b>-0.054</b> | <b>0.022</b> |
|                             |    | HR             | <b>0.052</b>            | <b>0.025</b> | <b>0.071</b>  | <b>0.002</b> | 0.024                        | 0.286        | <b>0.059</b>  | <b>0.012</b> |
|                             |    | RR             | -0.011                  | 0.638        | <b>0.048</b>  | <b>0.042</b> | <b>0.070</b>                 | <b>0.002</b> | <b>0.187</b>  | <b>0.000</b> |
|                             |    | Temp Deviation | 0.029                   | 0.212        | <b>0.174</b>  | <b>0.000</b> | <b>0.046</b>                 | <b>0.044</b> | <b>0.180</b>  | <b>0.000</b> |
|                             | 2  | Sleep Duration | 0.007                   | 0.766        | <b>-0.061</b> | <b>0.010</b> | 0.025                        | 0.276        | <b>-0.060</b> | <b>0.010</b> |
|                             |    | REM Sleep      | 0.026                   | 0.260        | -0.009        | 0.695        | 0.022                        | 0.334        | -0.034        | 0.143        |
|                             |    | Deep Sleep     | -0.017                  | 0.457        | -0.015        | 0.530        | -0.013                       | 0.586        | -0.022        | 0.339        |
|                             |    | HRV (RMSSD)    | -0.001                  | 0.974        | -0.023        | 0.332        | 0.005                        | 0.812        | -0.036        | 0.124        |
|                             |    | HR             | <b>0.048</b>            | <b>0.035</b> | <b>0.048</b>  | <b>0.040</b> | 0.017                        | 0.470        | 0.004         | 0.873        |
|                             |    | RR             | -0.038                  | 0.102        | -0.007        | 0.775        | 0.040                        | 0.083        | <b>0.083</b>  | <b>0.000</b> |
|                             |    | Temp Deviation | 0.009                   | 0.708        | <b>0.048</b>  | <b>0.042</b> | 0.015                        | 0.504        | <b>0.054</b>  | <b>0.022</b> |

Note. See Table 2 and Table 3 notes for variable descriptions and preparations. See also Table S4 note. Physiological metric pre-vaccination baseline period taken from nights -14 to -4 prior to first injection.

**Table S6.** Kendall rank order correlations between RBD antibody responses and device-generated metrics on nights before and after vaccine injections, adjusted for the pre-vaccination baseline period.

|                             |    | Metric         | Injection 1   |              | Injection 1 |       |               |              | Injection 2   |              |               |              |
|-----------------------------|----|----------------|---------------|--------------|-------------|-------|---------------|--------------|---------------|--------------|---------------|--------------|
|                             |    |                | J&J           |              | Moderna     |       | Pfizer        |              | Moderna       |              | Pfizer        |              |
|                             |    |                | $\tau$        | $P$          | $\tau$      | $P$   | $\tau$        | $P$          | $\tau$        | $P$          | $\tau$        | $P$          |
|                             |    |                |               |              |             |       |               |              |               |              |               |              |
| Night Relative to Injection | -2 | Sleep Duration | -0.061        | 0.366        | -0.025      | 0.557 | 0.036         | 0.185        | <b>0.098</b>  | <b>0.023</b> | 0.032         | 0.251        |
|                             |    | REM Sleep      | -0.037        | 0.585        | -0.040      | 0.344 | <b>0.056</b>  | <b>0.042</b> | 0.011         | 0.794        | 0.032         | 0.246        |
|                             |    | Deep Sleep     | -0.103        | 0.127        | -0.009      | 0.836 | -0.006        | 0.841        | 0.056         | 0.193        | 0.020         | 0.461        |
|                             |    | HRV (RMSSD)    | -0.072        | 0.285        | -0.027      | 0.522 | <b>-0.071</b> | <b>0.010</b> | 0.038         | 0.379        | 0.015         | 0.593        |
|                             |    | HR             | -0.079        | 0.243        | 0.022       | 0.608 | <b>0.070</b>  | <b>0.011</b> | -0.021        | 0.633        | -0.041        | 0.142        |
|                             |    | RR             | -0.052        | 0.446        | -0.004      | 0.929 | 0.045         | 0.103        | -0.036        | 0.410        | 0.025         | 0.362        |
|                             |    | Temp Deviation | -0.039        | 0.561        | 0.029       | 0.486 | 0.041         | 0.140        | 0.056         | 0.191        | -0.004        | 0.898        |
|                             | -1 | Sleep Duration | 0.032         | 0.637        | -0.006      | 0.877 | -0.024        | 0.385        | -0.012        | 0.783        | -0.014        | 0.611        |
|                             |    | REM Sleep      | -0.008        | 0.901        | -0.049      | 0.241 | -0.009        | 0.734        | -0.082        | 0.056        | -0.028        | 0.314        |
|                             |    | Deep Sleep     | 0.044         | 0.512        | -0.022      | 0.590 | 0.048         | 0.082        | 0.011         | 0.805        | 0.010         | 0.706        |
|                             |    | HRV (RMSSD)    | -0.051        | 0.447        | 0.027       | 0.510 | 0.004         | 0.883        | 0.040         | 0.356        | 0.034         | 0.224        |
|                             |    | HR             | 0.089         | 0.184        | 0.008       | 0.839 | -0.007        | 0.787        | -0.040        | 0.352        | 0.016         | 0.565        |
|                             |    | RR             | -0.001        | 0.993        | -0.006      | 0.889 | 0.006         | 0.830        | 0.044         | 0.308        | 0.003         | 0.913        |
|                             |    | Temp Deviation | 0.003         | 0.961        | 0.025       | 0.556 | 0.002         | 0.950        | 0.054         | 0.211        | -0.012        | 0.675        |
|                             | 0  | Sleep Duration | 0.108         | 0.110        | 0.073       | 0.088 | -0.033        | 0.228        | 0.012         | 0.784        | 0.016         | 0.574        |
|                             |    | REM Sleep      | 0.068         | 0.313        | 0.042       | 0.325 | -0.030        | 0.271        | 0.028         | 0.511        | 0.009         | 0.753        |
|                             |    | Deep Sleep     | -0.119        | 0.077        | -0.007      | 0.862 | -0.007        | 0.802        | -0.042        | 0.320        | <b>-0.084</b> | <b>0.002</b> |
|                             |    | HRV (RMSSD)    | -0.003        | 0.963        | -0.034      | 0.419 | 0.010         | 0.728        | <b>-0.091</b> | <b>0.031</b> | <b>-0.126</b> | <b>0.000</b> |
|                             |    | HR             | 0.092         | 0.175        | -0.020      | 0.637 | -0.014        | 0.606        | <b>0.114</b>  | <b>0.007</b> | <b>0.086</b>  | <b>0.002</b> |
|                             |    | RR             | 0.077         | 0.252        | 0.006       | 0.886 | 0.052         | 0.059        | <b>0.108</b>  | <b>0.011</b> | <b>0.079</b>  | <b>0.004</b> |
|                             |    | Temp Deviation | 0.113         | 0.096        | 0.016       | 0.710 | -0.001        | 0.983        | <b>0.122</b>  | <b>0.004</b> | <b>0.107</b>  | <b>0.000</b> |
|                             | 1  | Sleep Duration | <b>-0.150</b> | <b>0.027</b> | -0.053      | 0.208 | 0.018         | 0.512        | 0.068         | 0.116        | <b>0.056</b>  | <b>0.044</b> |
|                             |    | REM Sleep      | <b>-0.186</b> | <b>0.006</b> | 0.044       | 0.297 | -0.006        | 0.818        | 0.084         | 0.052        | 0.046         | 0.103        |
|                             |    | Deep Sleep     | -0.115        | 0.090        | 0.019       | 0.652 | 0.032         | 0.240        | <b>-0.092</b> | <b>0.035</b> | 0.004         | 0.873        |
|                             |    | HRV (RMSSD)    | 0.001         | 0.990        | -0.031      | 0.454 | -0.041        | 0.132        | -0.004        | 0.926        | -0.042        | 0.137        |
|                             |    | HR             | 0.027         | 0.692        | -0.038      | 0.368 | -0.004        | 0.874        | 0.032         | 0.454        | 0.037         | 0.183        |
|                             |    | RR             | 0.043         | 0.522        | 0.079       | 0.060 | 0.030         | 0.283        | <b>0.127</b>  | <b>0.003</b> | <b>0.180</b>  | <b>0.000</b> |
|                             |    | Temp Deviation | 0.055         | 0.416        | 0.072       | 0.087 | -0.007        | 0.796        | <b>0.128</b>  | <b>0.003</b> | <b>0.127</b>  | <b>0.000</b> |
|                             | 2  | Sleep Duration | 0.022         | 0.747        | -0.004      | 0.923 | 0.027         | 0.322        | -0.050        | 0.251        | -0.046        | 0.102        |
|                             |    | REM Sleep      | -0.080        | 0.234        | -0.015      | 0.722 | 0.011         | 0.698        | -0.063        | 0.144        | -0.021        | 0.453        |
|                             |    | Deep Sleep     | 0.025         | 0.716        | -0.014      | 0.740 | -0.009        | 0.734        | 0.035         | 0.412        | -0.046        | 0.100        |
|                             |    | HRV (RMSSD)    | -0.026        | 0.699        | 0.059       | 0.159 | -0.011        | 0.687        | 0.004         | 0.921        | <b>-0.076</b> | <b>0.006</b> |
|                             |    | HR             | 0.074         | 0.272        | 0.008       | 0.855 | 0.014         | 0.614        | 0.001         | 0.981        | 0.023         | 0.406        |
|                             |    | RR             | 0.054         | 0.420        | 0.076       | 0.069 | 0.021         | 0.446        | <b>0.107</b>  | <b>0.014</b> | <b>0.066</b>  | <b>0.018</b> |
|                             |    | Temp Deviation | <b>0.137</b>  | <b>0.043</b> | 0.034       | 0.416 | -0.016        | 0.556        | <b>0.096</b>  | <b>0.027</b> | 0.005         | 0.848        |

Note. See Table 2 and Table 3 notes for variable descriptions and preparations. See also Table S4 note.
